# Supplementary material
Source: PubMed Central journal article supplement (PMC3521603)
Supplement: NIHMS351606-supplement-2.pdf [file NIHMS351606-supplement-2.pdf]

## ONLINE METHODS

Full experimental details are presented in the supplementary information.

**Chemistry and radiochemistry.** Protein functionalization with DFO and subsequent radiolabeling with  $^{89}\text{Zr}$  was accomplished in accordance with previously reported methods<sup>19,39</sup>. Zirconium-89 was produced *via* the  $^{89}\text{Y}(p,n)^{89}\text{Zr}$  transmutation reaction on an EBCO TR19/9 variable beam energy cyclotron (Ebco Industries Inc.) and isolated in high radionuclidic and radiochemical purity (RCP) >99.9%, with an effective specific-activity of 195–497 MBq  $\mu\text{g}^{-1}$ , (5.28–13.43 mCi  $\mu\text{g}^{-1}$ ) as  $^{89}\text{Zr}$ -oxalate<sup>17</sup>. Quantification of radioactivity was achieved using a calibrated Automatic Wizard<sup>2</sup> Gamma Counter (Perkin Elmer) employing a dynamic energy window of 800–1000 keV for  $^{89}\text{Zr}$  (909 keV emission). Appropriate decay correction was employed throughout.

**Stability and metabolism studies.** Radiotracer stability was assessed *in vitro* by incubation in solutions of saline and PBS for 5 days at 37 °C. RCP was determined by radio-ITLC and  $\gamma$ -counting, and the protein-labeled fraction was measured at various time points by size-exclusion chromatography (PD-10, Sephadex G-25M, GE Healthcare). We conducted *in vitro* and *in vivo* metabolism studies in mouse urine, and mouse and human blood by using size-exclusion, radiometric, high-performance liquid chromatography (radio-HPLC). The radio-HPLC system was equipped with a Tosoh Science G3000SWXL column (300 mm  $\times$  7.8 mm; 5  $\mu\text{m}$ ; Fisher Scientific), and eluted with a 0.02 M sodium acetate, 0.15 M sodium chloride, pH6.4 mobile phase at flow rate of 1 mL  $\text{min}^{-1}$  at ambient temperature.

***In vivo* models.** All animal experiments were conducted in compliance with protocols approved by the Institutional Animal Care and Use Committee (IACUC) of Memorial Sloan-Kettering Cancer Center. Genetically engineered mouse (GEM) models of human prostate cancer (Hi-Myc mice at 4 and 12 months old) used in these experiments were maintained in our animal housing facility. Mouse models of inflammation were developed by s.c. injection of turpentine oil (50  $\mu$ l, neat) on the right hind limb of intact, immunocompetent male FVB mice (Taconic Farms Inc.). Xenograft models were induced on the right flank by sub-cutaneous (s.c.) injection of  $2.0 \times 10^5$  MycCaP cells in a 200  $\mu$ l cell suspension of a 1:1 v/v mixture of media with reconstituted basement membrane (BD Matrigel<sup>TM</sup>, Collaborative Biomedical Products Inc.). Palpable MycCap tumors (50–250 mm<sup>3</sup>) developed after a period of 14–21 days. Surgical castration was performed under anesthesia in accordance with our IACUC approved protocol.

**Biodistribution studies.** Biodistribution studies were conducted in accordance with previously reported methods<sup>19</sup>.

**Small-animal PET imaging.** PET imaging experiments were conducted on a microPET Focus 120 scanner (Concorde Microsystems). In repeated studies ( $n = 4$ ), mice were administered formulations of <sup>89</sup>Zr-mTf (11.6–13.7 MBq, [313–370  $\mu$ Ci], 35–41  $\mu$ g of protein, in 200  $\mu$ l sterile saline for injection) *via* i.v. tail-vein injection. Approximately 5 minutes prior to recording PET images, mice were anesthetized by inhalation of 1–2% isoflurane (Baxter Healthcare) in an oxygen gas mixture and placed on the scanner bed. PET images were recorded at various time-points between 1 – 120 h post-injection. Image reconstruction and processing details have been reported elsewhere<sup>19</sup>. Manually drawn 2-dimensional regions-of-interest (ROIs) or 3-

dimensional volumes-of-interest (VOIs) were used to determine the maximum and mean radiotracer accumulation in units of %ID g<sup>-1</sup> (decay corrected to the time of injection) in various tissues. Images were analyzed by using ASIPro VM<sup>TM</sup> software (Concorde Microsystems).

**Co-registered PET/CT.** Computed tomography (CT) images were acquired on a small-animal Siemens/CTI microCAT II (Siemens Medical Solutions) scanner with an 8.5 cm axial by 5.0 cm transaxial field-of-view. Co-registered PET/CT images were recorded at 16 h post-radiotracer administration. Images from the two separate modalities were mapped to a matrix and co-registered in accordance with previously reported methods<sup>40</sup>.

**Magnetic resonance (MR) imaging.** Mouse prostate MR images were acquired on a Bruker 4.7T Biospec scanner operating at 200 MHz and equipped with a 400 mT m<sup>-1</sup> ID 12 cm gradient coil (Bruker Biospin MRI).

**Statistical analyses.** Data were analysed by using the unpaired, two-tailed Student's *t*-test. Differences at the 95% confidence level ( $P < 0.05$ ) were considered to be statistically significant.
